# Supplementary material for: Salt Stress Inhibits Photosynthesis and Destroys Chloroplast Structure by Downregulating Chloroplast Development–Related Genes in Robinia pseudoacacia Seedlings
Source: MDPI journal article supplement (doi:10.3390/plants12061283), 2023-03-11
Supplement: s1 [file s1]

## Supplementary Materials

**Table S1.** Primer pairs for real-time quantitative PCR.

| Gene ID       | F1 (5'-3')                | F2 (5'-3')            |
|---------------|---------------------------|-----------------------|
| <i>Rppsba</i> | ACTGCAATTTAGAGAGACGCGAGA  | AATACCTACTACAGGCCAAGC |
| <i>Rppsab</i> | AAGGCTTAGCTCAGGACC        | CGCCAGGAGATTAAGAAC    |
| <i>Rppsaa</i> | AAGCATGGCTAAGTGATC        | GTCCGCTGAATAGAAACA    |
| <i>RppsbD</i> | CGGTCGTGACCAAGAAAC        | CGGATAAAGCACCTAAAC    |
| <i>RpndhE</i> | ATGCTCGAACATGTACTTGTTTTGA | AATCCGATAGCTGCTTCA    |
| <i>RpndhH</i> | CAGAAGCAATAACCGTAAATGG    | TCCAGAGCCTGCTGAATAA   |
| <i>RpropA</i> | CGCTTTATTCTGTCTCCA        | AGCCTTAGCCAATCTATC    |
| <i>RppcbC</i> | CGGTCGTGACCAAGAAAC        | CGGATAAAGCACCTAAAC    |
| <i>Rprps7</i> | TCACGGCGAGGTACTGCAGAAAAAA | ACTCCCTTTGGCAGCATC    |
| <i>Rppsac</i> | TCACATTCAGTAAAGATTTATGATA | GCCATAAATAAACCCGAACA  |
| <i>RpSOS1</i> | CTCTGCCATCTTCTGTTC        | CACTTCACCACTCCATTAG   |
| <i>RpNHX1</i> | CCTATCTGAGTGGCATTCT       | GCTTGGTAGTGATTCTTGAG  |
